# Supplementary material for: Usefulness of arterial spin labeling perfusion as an initial evaluation of status epilepticus
Source: PubMed Central journal article supplement (PMC8688435; doi:10.1038/s41598-021-03698-7), 2021-12-20
Supplement: 41598_2021_3698_MOESM1_ESM.pdf [file 41598_2021_3698_MOESM1_ESM.pdf]

# Usefulness of arterial spin labeling perfusion as an initial evaluation of status epilepticus

Tae-Joon Kim<sup>1,\*</sup>, Jin Wook Choi<sup>2,\*</sup>, Miran Han<sup>2</sup>, Byung Gon Kim<sup>1,3</sup>, Sun Ah Park<sup>1,4</sup>, Kyoong Huh<sup>1,5</sup>, Jun Young Choi<sup>1,3,¶</sup>

<sup>1</sup>Department of Neurology, Ajou University School of Medicine, Suwon, Republic of Korea

<sup>2</sup>Department of Radiology, Ajou University School of Medicine, Suwon, Republic of Korea

<sup>3</sup>Department of Brain Science, Ajou University School of Medicine, Suwon, Republic of Korea

<sup>4</sup>Department of Anatomy, Ajou University School of Medicine, Suwon, Republic of Korea

<sup>5</sup>Department of Medical Humanities & Social Medicine, Ajou University School of Medicine, Suwon, Republic of Korea

\*Co-first authors; these two authors contributed equally to the manuscript.

¶Corresponding author.

Jun Young Choi, MD, PhD.

Departments of Brain Science and Neurology, Ajou University School of Medicine, 164, World cup-ro, Yeongtong-gu, Suwon, Gyeonggi-do, 16499, Republic of Korea.

Tel: +82-31-219-4544, Fax: +82-31-219-4530

E-mail: jychoi@aumc.ac.kr, taz312@gmail.com

Supplementary Table S1. Detailed description of clinical information of 51 patients with SE

| Pt. no. | Age | Sex | SE etiology                                                                     | Seizure pattern         | Time progress (BZD, AED, MRI, EEG / anesthesia)* in hour | Change of each MRI sequence (ASL, DSC, FLAIR, DWI) | Angiography                                                                                 | ASL                                       | EEG                       | Match between EEG and ASL | Refractoriness | Discharge mRS |
|---------|-----|-----|---------------------------------------------------------------------------------|-------------------------|----------------------------------------------------------|----------------------------------------------------|---------------------------------------------------------------------------------------------|-------------------------------------------|---------------------------|---------------------------|----------------|---------------|
| 1       | 59  | M   | Alcohol withdrawal provoked combined with traumatic SAH, SDH                    | GCSE only               | 0.6, 2.3, 9.9, 11.8                                      | ↑↑↑-                                               | no steno-occlusion                                                                          | Rt hemisphere with thalamus               | Rt F-T ED                 | Lobar                     |                | 2             |
| 2       | 53  | M   | Unknown, possible autoimmune                                                    | SPSE evolving into GCSE | 1.3, 43.4, 6.6, 17.2 / 64.2                              | ↑↑↑↑                                               | no steno-occlusion                                                                          | Bilateral cingulate                       | Bi LPD, Lt T ictal        | Lobar                     | Super-RSE      | 6             |
| 3       | 20  | M   | Metabolic, hypoglycemic                                                         | GCSE only               | 0.8, 7.1, 9.8, 23.3                                      | ----                                               | n/a                                                                                         | no change                                 | nonspecific               | nonspecific, both         |                | 1             |
| 4       | 82  | M   | Posterior reversible encephalopathy syndrome                                    | SPSE                    | 3.5, 5.6, 7.8, 4.5 / 26.5                                | ↑↑↑↑                                               | no steno-occlusion                                                                          | Rt T and thalamus                         | Rt T ictal & LPD          | Lobar                     | Super-RSE      | 5             |
| 5       | 53  | M   | Metabolic, recurrent hypoglycemic, fever                                        | NCSE                    | 0.6, 17.3, 17.7, 14.7                                    | ↑↑--                                               | Mild basilar artery stenosis                                                                | Rt hemisphere                             | Rt hemisphere ictal & LPD | Lobar                     |                | 2             |
| 6       | 69  | M   | Acute Rt basal ganglia infarction with previous stroke                          | GCSE evolving into NCSE | 10.3, 13.5, 17.6, 21.1                                   | ↑---                                               | Lt ICA occlusion, Rt dICA & MCA severe stenosis                                             | Rt cingulate and thalamus                 | nonspecific               | nonspecific EEG           |                | 6             |
| 7       | 77  | M   | Old cerebral infarction                                                         | GCSE evolving into NCSE | 0.7, 1.2, 5.1, 7.6                                       | ↑↑↑-                                               | Rt pICA 80% stenosis, Lt pICA 50% stenosis, bi MCA moderate stenosis, Rt VA severe stenosis | Rt F-T                                    | Rt F-T ictal & LPD        | Lobar                     | RSE            | 4             |
| 8       | 60  | F   | Old cerebral infarction                                                         | GCSE only               | 1.8, 2.6, 11.1, 4.7                                      | ↑↑↑↑                                               | Rt ACA & MCA severe stenoses, Lt pICA mild stenosis, Lt PCA narrowing                       | Rt T-O                                    | Rt T-O ictal              | Lobar                     |                | 5             |
| 9       | 51  | F   | Old traumatic SAH                                                               | SPSE evolving into GCSE | 1.3, 21.0, 14.6, 18.5                                    | ↑↑-↑                                               | Bi carotid bulb mild stenosis                                                               | Lt hemisphere with Lt thalamus            | Lt F-T ictal, Lt LPD      | Lobar                     | RSE            | 2             |
| 10      | 30  | M   | AED dose decreased and skipped once, remote methotrexate induced encephalopathy | GCSE only               | 0.7, 4.4, 4.0, 44.0                                      | ↓↓↑↑                                               | no steno-occlusion                                                                          | Rt F-T-P hypoperfusion                    | Rt T ED                   | Lobar, ASL hypoperfusion  |                | 1             |
| 11      | 83  | M   | Dementia                                                                        | GCSE only               | 0.7, 2.0, 3.7, 10.9                                      | ↓---                                               | Rt dICA severe stenosis, multifocal stenoses at intracranial arteries                       | Lt hemispheric and thalamic hypoperfusion | Lt F-T ED                 | Lobar, ASL hypoperfusion  |                | 2             |
| 12      | 79  | M   | Old Rt T ICH, traumatic                                                         | GCSE evolving into NCSE | 0.7, 3.8, 6.6, 14.5                                      | ↑-↑-                                               | n/a                                                                                         | Rt insula and medial T and both thalamus  | Rt T ictal & LPD          | Lobar                     | RSE            | 2             |
| 13      | 63  | M   | AED skipped for one month, old Rt MCA territory infarction                      | SPSE                    | 37.3, 38.4, 46.3, 50.9                                   | --↑-                                               | n/a                                                                                         | no change                                 | Rt F-T ictal              | nonspecific ASL           | RSE            | 3             |
| 14      | 21  | M   | Unknown, possible autoimmune                                                    | GCSE only               | 0.5, 4.5, 14.6, 18.7 / 7.0                               | ↑-↑-                                               | no steno-occlusion                                                                          | Rt hemisphere                             | Rt T-O > Lt T ictal       | Lobar                     | Super-RSE      | 6             |
| 15      | 61  | M   | Old Lt MCA territory infarction                                                 | GCSE only               | 0.4, 4.8, 6.5, 18.9                                      | ↓↓↑-                                               | no steno-occlusion                                                                          | Lt hemispheric and thalamic hypoperfusion | Lt hemisphere, postictal  | Lobar, ASL hypoperfusion  |                | 2             |
| 16      | 45  | F   | AED change in known epilepsy                                                    | GCSE only               | 1.1, 2.4, 5.6, 13.4                                      | --↑-                                               | n/a                                                                                         | no change                                 | Rt T ED                   | nonspecific ASL           |                | 1             |

|    |    |   |                                                    |                         |                              |         |                                                                          |                                           |                                 |                          |           |   |
|----|----|---|----------------------------------------------------|-------------------------|------------------------------|---------|--------------------------------------------------------------------------|-------------------------------------------|---------------------------------|--------------------------|-----------|---|
| 17 | 74 | M | Known epilepsy, old Rt contusion hemorrhage        | GCSE only               | 1.8, 4.4, 22.4, 4.7          | ↑ - ↑ - | Lt carotid bulb mild stenosis                                            | Rt hemisphere                             | nonspecific                     | nonspecific EEG          |           | 2 |
| 18 | 87 | F | Known epilepsy, old Rt posterior cerebromalacia    | GCSE only               | 0.3, 3.1, 5.3, 9.9           | ↓ - ↑ - | multifocal stenoses including bi MCA and ACA                             | Rt hemispheric and thalamic hypoperfusion | Rt hemisphere, postictal        | Lobar, ASL hypoperfusion |           | 4 |
| 19 | 60 | M | Old Lt T neurocysticercosis                        | GCSE only               | 0.7, 42.0, 9.1, 15.6         | ↑ - ↑ - | n/a                                                                      | Lt T and thalamus                         | nonspecific                     | nonspecific EEG          |           | 0 |
| 20 | 62 | F | Old Lt traumatic SDH                               | NCSE                    | 3.4, 7.8, 11.0, 45.2         | ↑ - - - | no steno-occlusion                                                       | Rt hemisphere                             | Lt F-T ictal, bi hemispheric ED | Discordant               |           | 3 |
| 21 | 76 | F | Old cerebral infarction                            | GCSE only               | 0.2, 9.2, 8.7, 12.8          | ↑ ↑ - - | Lt MCA and Lt VA stenosis                                                | Rt T-O and thalamus                       | Bi hemisphere LPD               | Discordant               |           | 4 |
| 22 | 78 | M | Old ICH                                            | GCSE only               | 1.3, 6.5, 17.4, 19.7         | ↑ ↑ ↑ - | Lt MCA, Lt VA, Rt pICA moderate stenosis                                 | Rt T-P-O                                  | Rt hemisphere, postictal        | Lobar                    |           | 4 |
| 23 | 82 | M | Paraneoplastic syndrome (anti-hu)                  | GCSE only               | 0.3, 8.2, 6.6, 14.0          | ↑ ↑ - - | no steno-occlusion                                                       | Rt T-O-F and thalamus                     | Rt hemispheric RD, Rt P ED      | Lobar                    |           | 1 |
| 24 | 36 | M | Old traumatic ICH                                  | GCSE only               | 1.3, 5.3, 6.2, 10.9          | ↑ - ↑ - | n/a                                                                      | Rt T-O                                    | Rt F-T ED                       | Lobar                    |           | 0 |
| 25 | 78 | M | Old Lt F ICH                                       | GCSE evolving into NCSE | 4.0, 11.6, 14.3, 29.7        | ↑ ↑ ↑ ↑ | n/a                                                                      | Lt F and both thalamus                    | Lt F-T ictal                    | Lobar                    | RSE       | 2 |
| 26 | 84 | F | Old Rt MCA territory infarction                    | GCSE only               | 0.6, 5.0, 6.0, 12.1          | ↑ - ↑ ↑ | Bi MCA focal stenoses                                                    | Rt T                                      | Rt F postictal                  | Laterality               |           | 2 |
| 27 | 54 | M | Old traumatic bi F SDH                             | GCSE only               | 0.8, 6.1, 6.7, 13.5          | ↑ - ↑ - | Lt carotid bulb mild stenosis                                            | Lt medial T and both thalamus             | nonspecific                     | nonspecific EEG          |           | 0 |
| 28 | 68 | M | Cancer brain metastasis                            | GCSE only               | 1.3, 2.3, 2.9, 6.0           | ↑ ↑ ↑ ↑ | no steno-occlusion                                                       | Bilateral F and Lt thalamus               | nonspecific                     | nonspecific EEG          |           | 6 |
| 29 | 85 | M | Vascular dementia with cerebral amyloid angiopathy | GCSE only               | 1.0, 5.9, 8.9, 12.4          | ↑ - ↑ ↑ | n/a                                                                      | Lt medial T                               | nonspecific                     | nonspecific EEG          | RSE       | 2 |
| 30 | 29 | F | Unknown, possible autoimmune                       | GCSE evolving into NCSE | 2.5, 27.2, 15.0, 19.9        | ↑ - ↑ - | n/a                                                                      | Lt medial T                               | Bi (Lt>Rt) T ictal              | Lobar                    |           | 1 |
| 31 | 78 | F | Recurrent fever of unknown origin                  | SPSE                    | 2.8, 6.7, 6.2, 10.3          | ↑ ↑ - ↑ | no steno-occlusion                                                       | Rt F-T and Lt thalamus                    | Lt F-T LPD                      | Discordant               |           | 5 |
| 32 | 84 | F | Hyponatremia with old cerebral infarction          | GCSE evolving into NCSE | 1.0, 23.8, 18.9, 28.9 / 32.4 | ↑ ↑ - ↑ | no steno-occlusion                                                       | Lt P                                      | Lt F-P ictal                    | Lobar                    | RSE       | 5 |
| 33 | 77 | M | Acute hypoxia                                      | GCSE only               | 0.9, 1.2, 4.3, 10.1          | ↑ ↑ - - | n/a                                                                      | Rt hemisphere with thalamus               | Lt F-T LPD                      | Discordant               |           | 2 |
| 34 | 75 | M | Alzheimer's dementia                               | GCSE only               | 1.2, 1.7, 5.5, 9.3           | ↑ - - - | Lt pICA 50% stenosis, Rt pICA 30% stenosis, BA stenosis, Rt VA occlusion | Lt lateral T                              | nonspecific                     | nonspecific EEG          |           | 4 |
| 35 | 61 | F | Unknown, possible autoimmune                       | GCSE evolving into NCSE | 1.5, 13.8, 16.3, 8.1 / 79.7  | - - - - | n/a                                                                      | no change                                 | Bi T ictal                      | nonspecific ASL          | Super-RSE | 2 |
| 36 | 84 | M | Old Rt MCA territory infarction                    | GCSE only               | 0.8, 1.4, 2.7, 6.3           | ↑ - - - | Bi MCA diffuse narrowing, bi PCA mild stenosis                           | Lt medial F and thalamus                  | Lt F-T ictal                    | Lobar                    |           | 5 |
| 37 | 47 | M | Propofol induced                                   | NCSE                    | 29.8, 40.0, 25.9, 29.5       | ↑ ↑ - - | no steno-occlusion                                                       | Lt F-P                                    | Lt F postictal                  | Lobar                    |           | 3 |
| 38 | 81 | M | Vascular dementia                                  | GCSE evolving into NCSE | 0.5, 4.8, 8.1, 20.9 / 39.0   | ↑ - ↑ ↑ | no steno-occlusion                                                       | Rt medial T and thalamus                  | Rt F ictal                      | Laterality               | RSE       | 6 |
| 39 | 56 | M | AED skipped, chronic alcoholic                     | GCSE evolving into NCSE | 0.9, 4.8, 12.8, 15.9 / 81.6  | ↑ - ↑ ↑ | no steno-occlusion                                                       | Lt T                                      | Lt T-P LPD                      | Lobar                    | Super-RSE | 4 |
| 40 | 87 | F | Vascular dementia                                  | GCSE evolving into NCSE | 0.6, 1.5, 2.9, 9.0           | ↑ ↑ ↑ ↑ | no steno-occlusion                                                       | Lt hemisphere with thalamus               | Lt hemispheric LPD              | Lobar                    | RSE       | 6 |
| 41 | 35 | M | Tuberous sclerosis                                 | GCSE only               | 3.7, 4.3, 5.7, 12.3          | ↑ - ↑ - | n/a                                                                      | Bi F                                      | Bi F ictal & ED                 | Lobar                    | RSE       | 1 |

|    |    |   |                                      |                         |                       |         |                                          |                             |                        |                 |     |   |
|----|----|---|--------------------------------------|-------------------------|-----------------------|---------|------------------------------------------|-----------------------------|------------------------|-----------------|-----|---|
| 42 | 68 | M | Bain tumor                           | GCSE evolving into NCSE | 3.3, 4.9, 6.6, 11.0   | ↑ -- ↑  | n/a                                      | Rt medial T and thalamus    | Rt F LPD               | Laterality      | RSE | 4 |
| 43 | 55 | M | Known epilepsy                       | NCSE                    | 7.5, 7.5, 23.4, 18.0  | ↑ ---   | n/a                                      | Rt F-T                      | Rt F ictal             | Lobar           | RSE | 2 |
| 44 | 62 | M | Alzheimer's dementia                 | GCSE only               | 3.2, 3.1, 20.4, 36.3  | ↑ ---   | Bi pICA severe stenoses (Rt 90%, Lt 70%) | Rt P                        | Rt T ictal             | Laterality      | RSE | 3 |
| 45 | 79 | M | Alzheimer's dementia                 | GCSE evolving into NCSE | 22.5, 22.5, 11.7, 8.0 | ↑ ---   | n/a                                      | Rt medial T                 | Rt T ED                | Lobar           | RSE | 5 |
| 46 | 34 | F | MELAS syndrome                       | SPSE                    | 3.9, 3.0, 9.4, 13.8   | ↑ ↑ ↑ ↑ | no steno-occlusion                       | Rt P-T-O and thalamus       | Rt T ictal             | Lobar           |     | 2 |
| 47 | 19 | F | Autoimmune encephalitis (anti-NMDAR) | GCSE only               | 2.1, 3.3, 13.7, 112.2 | ↑ ---   | n/a                                      | Rt hemisphere               | Bi T (Rt>Lt) postictal | Lobar           |     | 2 |
| 48 | 78 | F | Old cerebral infarction              | SPSE evolving into GCSE | 2.8, 48.8, 2.4, 26.6  | ↑ -- ↑  | no steno-occlusion                       | Lt hemisphere with thalamus | Lt T postictal         | Lobar           |     | 1 |
| 49 | 57 | M | Old brain hemorrhage                 | GCSE evolving into NCSE | 0.6, 2.3, 5.9, 10.0   | ↑ -- ↑  | no steno-occlusion                       | Lt lateral T and thalamus   | Lt T RD                | Lobar           |     | 1 |
| 50 | 50 | M | Old cerebromalacia                   | GCSE only               | 1.6, 1.8, 13.3, 3.0   | ----    | no steno-occlusion                       | no change                   | Lt F-T postictal       | nonspecific ASL |     | 1 |
| 51 | 59 | F | Unknown                              | GCSE only               | 1.4, 3.9, 6.8, 21.7   | ↑ ---   | no steno-occlusion                       | Lt T                        | Lt T postictal         | Lobar           |     | 3 |

\*Time progress of FAT to BZD, AED, MRI, EEG / anesthesia. Only in the case of patients who were treated with continuous infusion of anesthetic agents for refractory status epilepticus, the timepoint of anesthesia is indicated.

Abbreviations: SE, status epilepticus; BZD, benzodiazepine; AED, antiepileptic drug; MRI, magnetic resonance imaging; EEG, electroencephalography; ASL, arterial spin labeling; DSC, dynamic susceptibility contrast; FLAIR, fluid attenuated inversion recovery; DWI, diffusion weighted imaging; mRS, modified Rankin Scale; SAH, subarachnoid hemorrhage; SDH, subdural hematoma; ICH, intracerebral hemorrhage; MCA, middle cerebral artery; NMDAR, N-methyl-D-aspartate receptor; GCSE, generalized convulsive SE; SPS, simple partial SE; NCSE, nonconvulsive SE; n/a, not available; ICA, internal carotid artery; dICA, distal internal carotid artery; pICA, proximal internal carotid artery; ACA, anterior cerebral artery; PCA, posterior cerebral artery; VA, vertebral artery; F, frontal lobe; T, temporal lobe; O, occipital lobe; Lt, left; Rt, right; Bi, bilateral; LPD, lateralized periodic discharge; ED, epileptiform discharge; RSE, refractory SE.

## SUPPLEMENTARY FIGURE

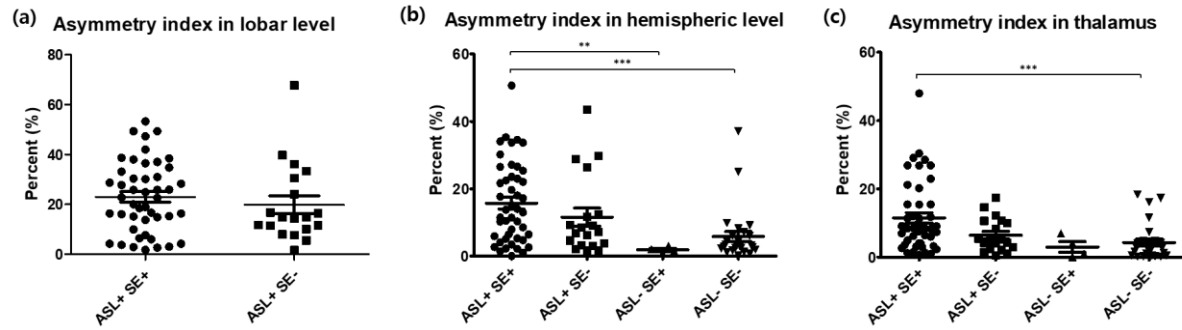

**Supplementary Figure 1. Quantitative analysis of ASL perfusion image.** Asymmetric indices (a) between lesion (hyper- or hypoperfusion) and non-lesion sides lobar level, (b) between both hemispheres, and (c) between both thalami. Abbreviations: ASL, arterial spin labeling; ASL+, visual change present in ASL; ASL-, visual change absent in ASL; SE+, group with status epilepticus; SE-, group with self-limited seizures
